# Supplementary material for: Direct generation of polypyrrole-coated palladium nanoparticles inside a metal-organic framework for a semihydrogenation catalyst
Source: Royal Society of Chemistry journal article supplement (doi:10.1039/d2ra08190c), 2023-01-01
Supplement: d2ra08190c1.pdf [file d2ra08190c1.pdf]

SUPPLEMENTARY INFORMATION

**Direct generation of polypyrrole-coated palladium nanoparticles inside a metal-organic framework for semihydrogenation catalyst**

Yohei Takashima,\* Seiko Tetsusashi, Shintaro Tanaka, Takaaki Tsuruoka and Kensuke Akamatsu\*

*Department of Nanobiochemistry, Frontiers of Innovative Research in Science and Technology (FIRST), Konan University,  
7-1-20 Minatojimaminamimachi, Chuo-ku, Kobe 650-0047, Japan*

E-mail: [takashim@konan-u.ac.jp](mailto:takashim@konan-u.ac.jp)

Supporting data

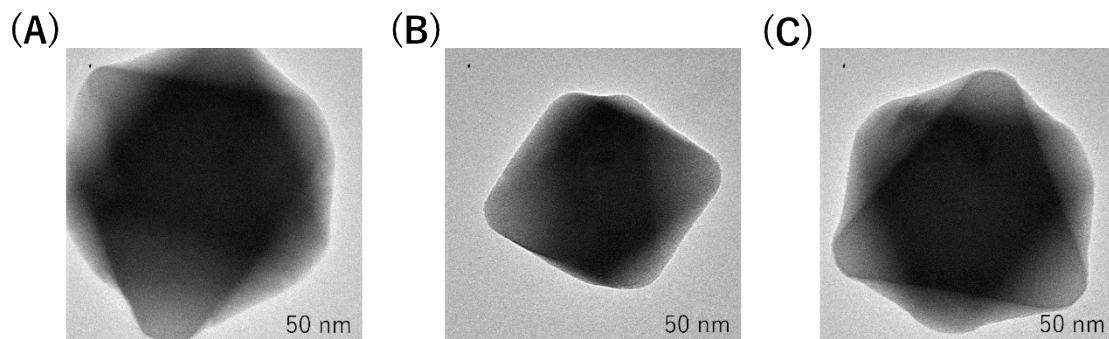

**Figure S1.** TEM images of (A) Pd(OAc)<sub>2</sub>@MIL-101(12), (B) Pd(OAc)<sub>2</sub>@MIL-101(24) and (C) Pd(OAc)<sub>2</sub>@MIL-101(36).

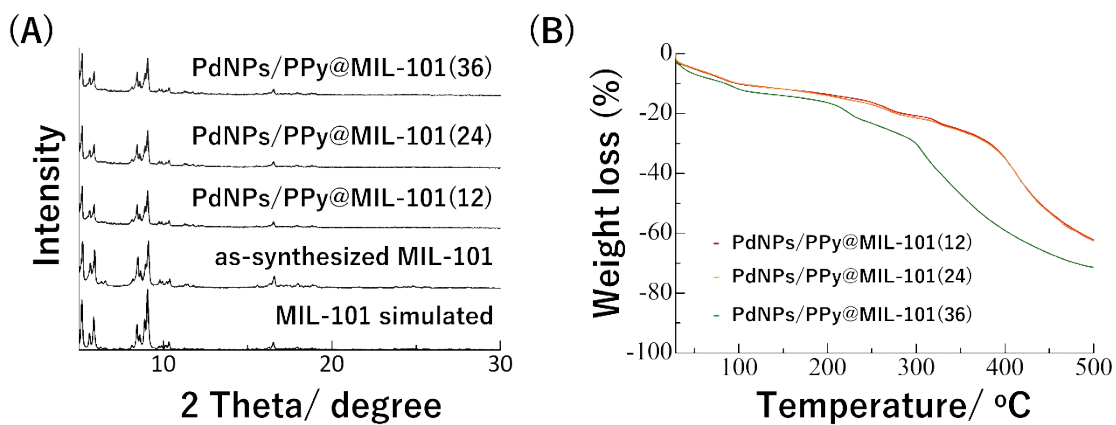

**Figure S2.** (A) XRD patterns and (B) TG profiles of PdNPs/PPy@MIL-101.

SUPPLEMENTARY INFORMATION

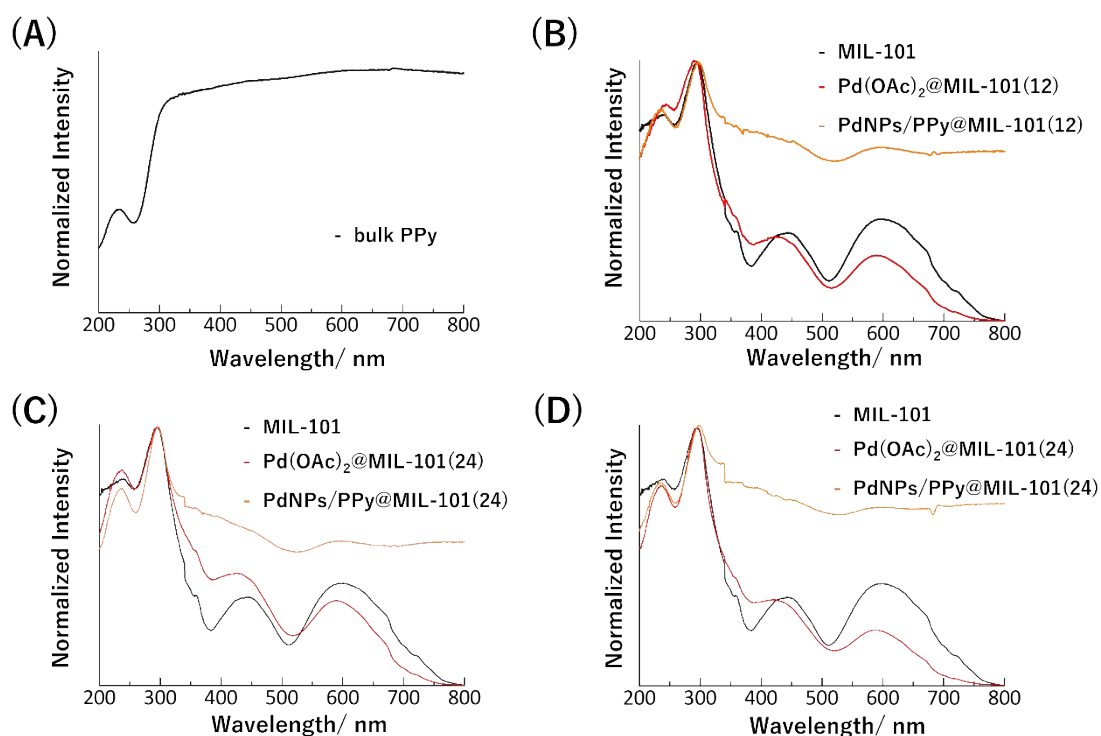

**Figure S3.** UV-Vis diffuse reflectance spectra: (A) bulk PPy; (B) Pd(OAc)<sub>2</sub>@MIL-101(12) and PdNPs/PPy@MIL-101(12); (C) Pd(OAc)<sub>2</sub>@MIL-101(24) and PdNPs/PPy@MIL-101(24); (D) Pd(OAc)<sub>2</sub>@MIL-101(36) and PdNPs/PPy@MIL-101(36).

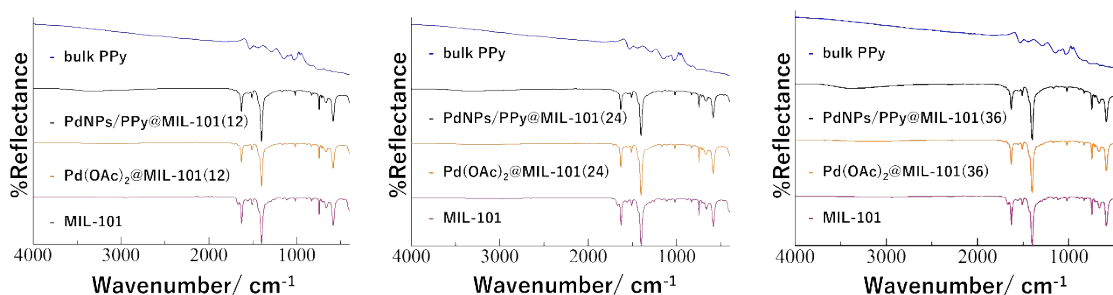

**Figure S4.** IR spectra of MIL-101, Pd(OAc)<sub>2</sub>@MIL-101, PdNP/PPy@MIL-101 and bulk PPy.

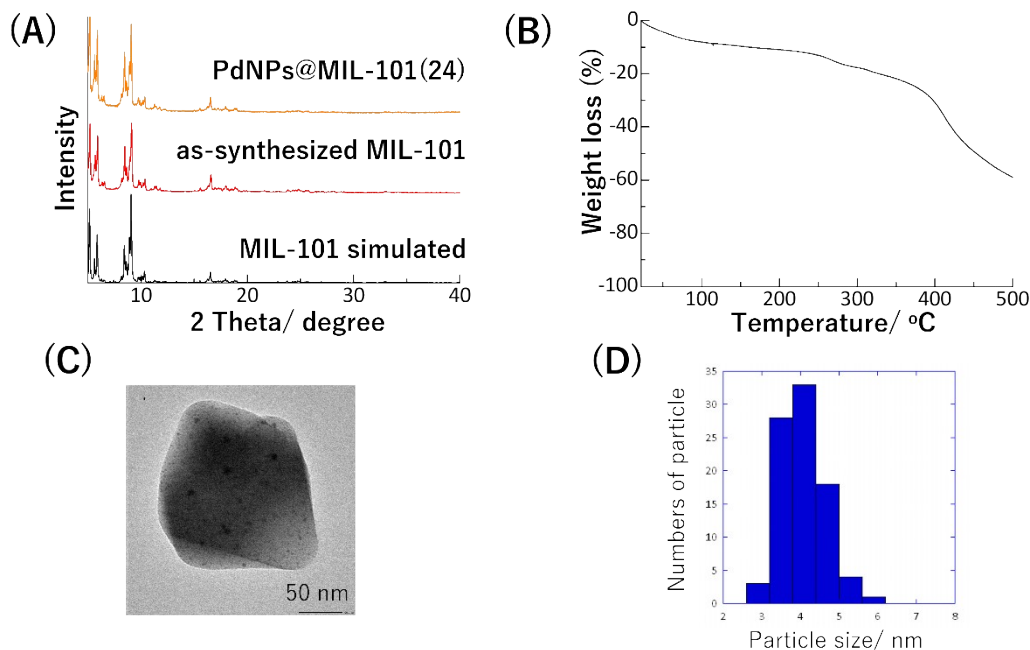

**Figure S5.** (A) XRD pattern of PdNPs@MIL-101(24). (B) TG profile of PdNPs@MIL-101(24). (C) TEM image of PdNPs@MIL-101(24). (D) PdNP size distribution histogram of PdNPs@MIL-101(24).

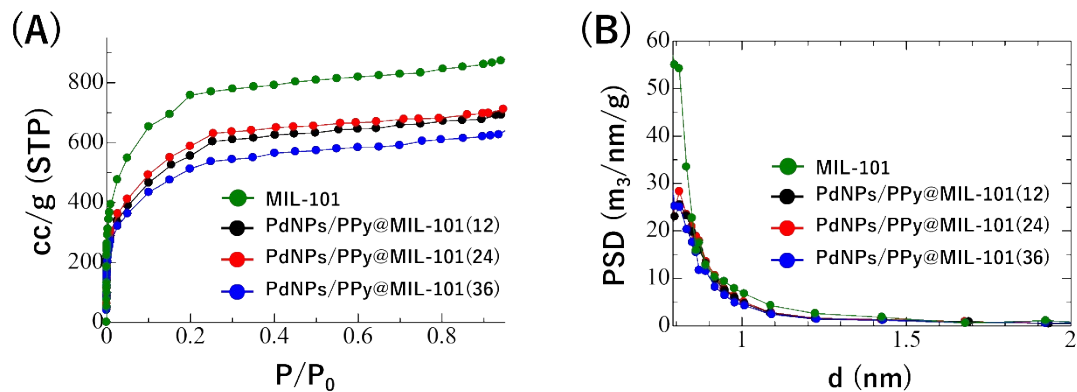

**Figure S6.** (A) N<sub>2</sub> gas adsorption at 77 K and (B) pore size distribution of MIL-101, PdNPs/PPy@MIL-101(12), PdNPs/PPy@MIL-101(24) and PdNPs/PPy@MIL-101(36).

SUPPLEMENTARY INFORMATION

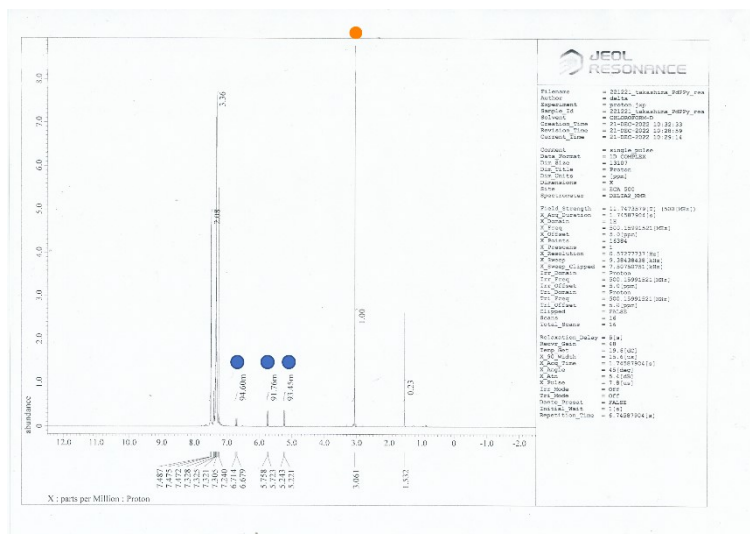

Phenylacetylene conversion: 9%

Styrene selectivity: 100%

Figure S7. <sup>1</sup>H NMR chart of the reaction solution after 4 hours for the hydrogenation of phenylacetylene in the presence of PdNPs-PPY composite ([Pd] 0.05 mol%). The peaks corresponding to the alkene protons of styrene and the alkyne proton of phenylacetylene were marked with blue and orange circles, respectively.
